# Supplementary material for: Lipoprotein(a) and incident type-2 diabetes: results from the prospective Bruneck study and a meta-analysis of published literature
Source: Springer Nature journal article supplement (doi:10.1186/s12933-017-0520-z), 2017-03-21
Supplement: MOESM1 [file 12157734]

# Lipoprotein(a) and Incident Type-2 Diabetes: Results from the Prospective Bruneck Study and a Meta-analysis of Published Literature

## Online appendix

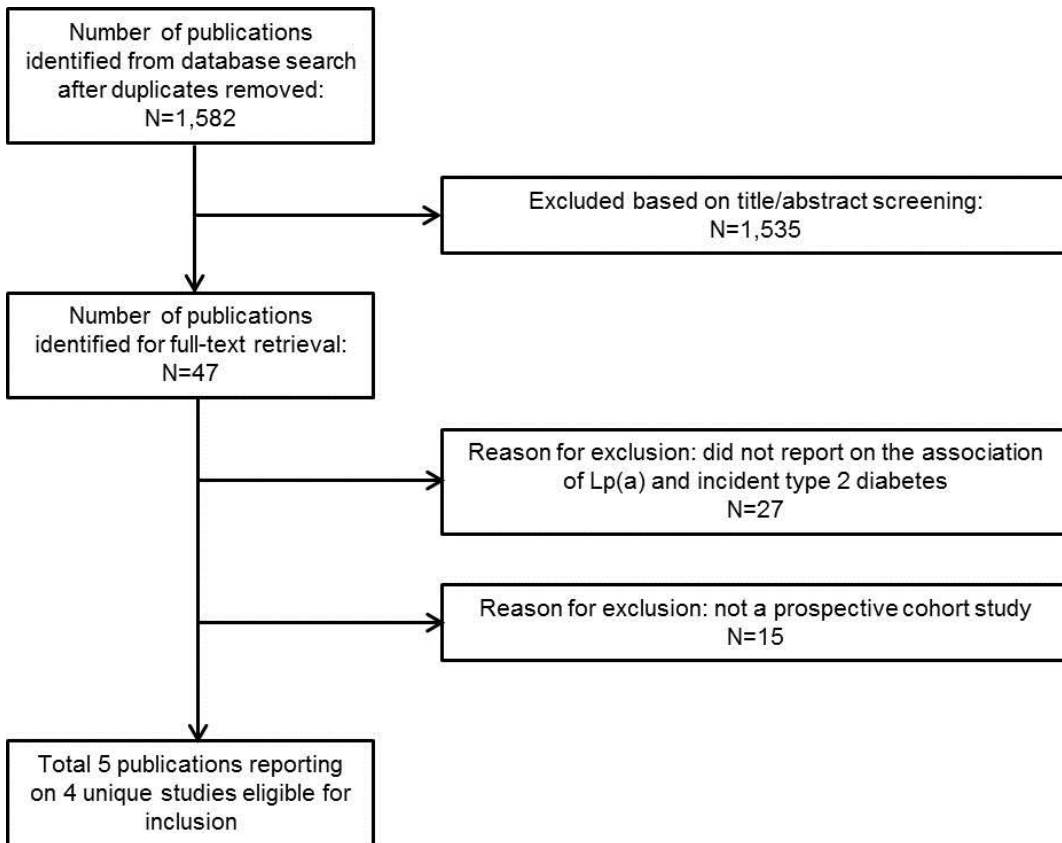

Figure A1: Flow-chart showing study selection for the literature-based meta-analysis

**A) Within-study correlation estimated at 0.2**

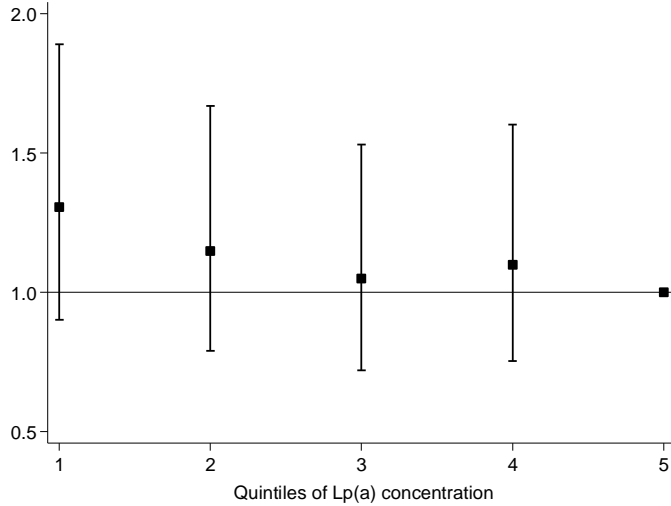

**B) Within-study correlation estimated at 0.5**

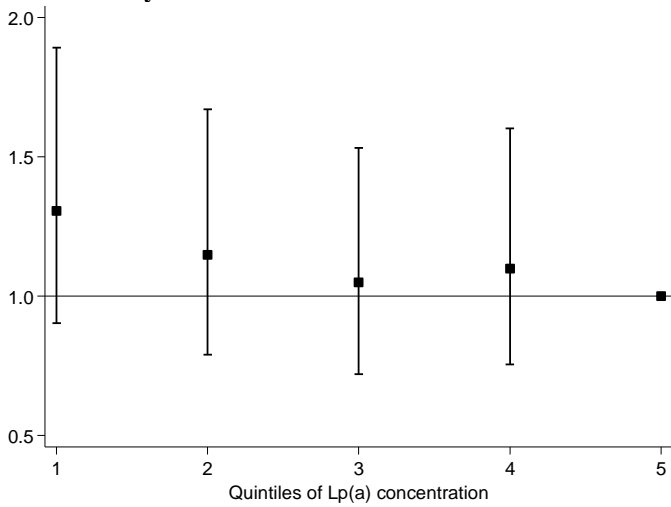

**C) Within-study correlation estimated at 0.8**

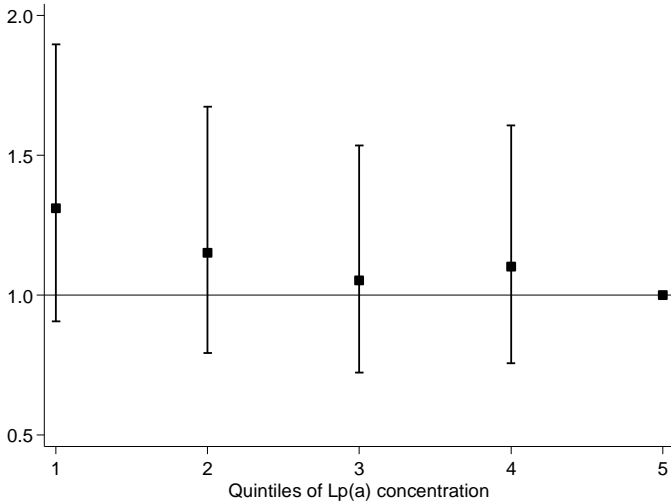

**Figure A2: Sensitivity analysis showing the shape plots of the risk of type-2 diabetes by Lp(a) quintiles. Results are from three multivariate meta-analyses with varying levels of estimated within-study correlation: A) 0.2; B) 0.5; and C) 0.8.**

Based on multivariate meta-analyses of data from: the Bruneck study (Model 3); the Copenhagen City Heart Study; the Copenhagen General Population Study; the European Prospective Investigation of Cancer – Norfolk study; and the Women's Health Study.

**Table A1: Effect sizes and 95% confidence intervals extracted from published studies**

|                  | WHS study         |                                | CCHS and CGPS studies |                                | EPIC-Norfolk study |                                |
|------------------|-------------------|--------------------------------|-----------------------|--------------------------------|--------------------|--------------------------------|
|                  | HR (95% CI)       | Median (range)<br>Lp(a) conc.* | OR (95% CI)           | Median (range)<br>Lp(a) conc.* | HR (95% CI)        | Median (range)<br>Lp(a) conc.* |
| <b>Quintiles</b> |                   |                                |                       |                                |                    |                                |
| 1                | Reference         | (<3.9)                         | 1.26 (1.09, 1.45)     | 3 (1-4)                        | Reference          | 3.9 (2.0-5.3)                  |
| 2                | 0.87 (0.75, 1.01) | (3.9-8.4)                      | 1.17 (1.01, 1.36)     | 7 (5-11)                       | 0.66 (0.50, 0.86)  | 7.1 (5.3-9.0)                  |
| 3                | 0.80 (0.68, 0.93) | (8.5-16.6)                     | 1.04 (0.90, 1.21)     | 14 (10-19)                     | 0.70 (0.54, 0.92)  | 11.6 (9.0-15.4)                |
| 4                | 0.88 (0.76, 1.02) | (16.7-45.3)                    | 1.05 (0.90, 1.22)     | 28 (20-35)                     | 0.75 (0.58, 0.97)  | 21.8 (15.4-35.4)               |
| 5                | 0.78 (0.67, 0.91) | (>45.3)                        | Reference             | 69 (55-99)                     | 0.64 (0.49, 0.85)  | 53.5 (35.4-175.0)              |

CCHS= Copenhagen City Heart Study; CGPS= Copenhagen General Population Study; EPIC-Norfolk= European Prospective Investigation of Cancer – Norfolk; WHS=Women's Health Study. \*Lp(a) concentration given as mg/dL.
